# Supplementary material
Source: MDPI journal article supplement (https://www.mdpi.com/2075-5309/14/2/514)
Supplement: s1 [file s1]

## Survey on the Community Living Circle in Yongning Village

**Objective of the Survey:** The purpose of this survey is to enhance the quality of rural life and improve the governance of safety in rural areas. By gathering the villagers' demands for local developments, this initiative seeks to engage in a public opinion solicitation activity. The information collected through this questionnaire is intended exclusively for internal analysis and research purposes and will not be utilized for commercial or any other uses. Your honest and accurate responses are highly appreciated. Thank you for your support and cooperation.

**Instructions for Completion:** Please provide your answers or circle the appropriate options.

### I. Basic Information of Residents (Household Level)

[1] Composition and Educational Level of Your Household (please sketch a family tree) (Use "△" to represent male members and "○" to represent female members. Please also indicate the age of each member.)

[2] Your Living Arrangements:

- A. The entire family lives together.
- B. Some members live here permanently, while others reside in the county town/Yunyan Town.
- C. Alternating between urban and rural living.

[3] Self-care Ability of Family Members Aged 60 and Above:

- A. Fully self-sufficient: \_\_\_\_ person(s)
- B. Partially dependent: \_\_\_\_ person(s)
- C. Almost entirely dependent: \_\_\_\_ person(s)

Presence of chronic diseases, specify: \_\_\_\_\_

[4] Daily Living Behavior Characteristics at the Household Level (specify particular behaviors e.g., sleeping, eating, farming, exercising, reading)

|                    |   |   |   |   |    |    |    |    |    |
|--------------------|---|---|---|---|----|----|----|----|----|
| Production (Field) | 0 | 3 | 6 | 9 | 12 | 15 | 18 | 21 | 24 |
| Living (Home)      | 0 | 3 | 6 | 9 | 12 | 15 | 18 | 21 | 24 |
| Others             | 0 | 3 | 6 | 9 | 12 | 15 | 18 | 21 | 24 |

### II. Resident Evaluation

[5] Top three aspects of dissatisfaction regarding the village of residence:

- A. Convenience of transportation
- B. Living environment
- C. Daily shopping
- D. Neighborhood relations
- E. Village culture/productive atmosphere
- F. Cultural activities
- G. Fitness activity facilities
- H. Medical facilities
- I. Public safety
- J. Landscape and scenery

### III. Travel Patterns and Living Circle Range Measurement

[6] What is the primary mode of transportation used by your household on a daily basis? What is generally used within the village?

- A. Bicycle
- B. Motorcycle
- C. Bus
- D. Car
- E. Walking
- F. Other

Distance from home to farmland/orchard approximately: \_\_\_\_ (m). It takes \_\_\_\_ (mode) \_\_\_\_ (time in minutes).

[7] Travel range and frequency (purposes include: visiting relatives, socializing, shopping, entertainment, medical care, etc.)

| Location       | Frequency                                                  |                |             |              |                  | Mode of Transportation |
|----------------|------------------------------------------------------------|----------------|-------------|--------------|------------------|------------------------|
|                | Daily                                                      | 2-3 times/week | Once a week | Once a month | Every few months |                        |
| Yunyan Town    |                                                            |                |             |              |                  |                        |
| Yichuan County |                                                            |                |             |              |                  |                        |
| Yan'an City    |                                                            |                |             |              |                  |                        |
| Xi'an City     |                                                            |                |             |              |                  |                        |
| Other          | (e.g., tourism)—specify frequency and approximate location |                |             |              |                  |                        |

### IV. Facility Utilization

[8] Which additional services or facilities do you most hope to see introduced? (Up to 3 selections allowed)

- A. Mini convenience store
- B. Offline Internet delivery pick-up point
- C. Medical clinic
- D. Senior citizen's canteen
- E. Fitness station
- F. Activity room
- G. Daycare center (daytime care with return to home for overnight rest)

[9] If your household includes elderly members, which elderly care model do you prefer? (Select one; if there are no elderly members in your household, you may skip this question)

- A. Home-based care (mainly provided by family members, with the community offering part-time home care services)

B. Daycare (daytime at an elderly activity center, with return to home for overnight rest)

C. Institutional care (full-time living in a nursing home or similar facility)

[10] Utilization of Business Types within the Daily Living Circle (Village–Town)

| Facility Categories |                           |                                            | Demand Frequency |                 |        |         |                  |
|---------------------|---------------------------|--------------------------------------------|------------------|-----------------|--------|---------|------------------|
|                     |                           |                                            | Daily            | Every Other Day | Weekly | Monthly | Every Few Months |
| Village Domain      | Public Service Facilities | Rural Health Clinic                        |                  |                 |        |         |                  |
|                     |                           | Rural Library                              |                  |                 |        |         |                  |
|                     |                           | Village Committee Office                   |                  |                 |        |         |                  |
|                     | Commerce                  | Convenience Store                          |                  |                 |        |         |                  |
|                     | Transportation            | Bus Stop                                   |                  |                 |        |         |                  |
| Town Domain         | Commerce                  | Supermarket                                |                  |                 |        |         |                  |
|                     |                           | Meat and Vegetable Sale Points             |                  |                 |        |         |                  |
|                     |                           | General Department Store                   |                  |                 |        |         |                  |
|                     |                           | Online Shopping and Courier Service Points |                  |                 |        |         |                  |
|                     |                           | Catering Industry                          |                  |                 |        |         |                  |
|                     | Finance                   | Bank                                       |                  |                 |        |         |                  |
|                     |                           | Post Office                                |                  |                 |        |         |                  |
|                     | Medical and Health        | Small Clinic                               |                  |                 |        |         |                  |
|                     |                           | Pharmacy                                   |                  |                 |        |         |                  |
|                     |                           | Comprehensive Hospital                     |                  |                 |        |         |                  |
|                     | Education                 | Primary and Secondary Schools              |                  |                 |        |         |                  |
|                     |                           | Kindergarten                               |                  |                 |        |         |                  |
|                     | Elderly Care              | Daytime Care and Nursing                   |                  |                 |        |         |                  |
|                     |                           | Elderly Care Facilities                    |                  |                 |        |         |                  |
|                     | Administration            | Police Station/Office                      |                  |                 |        |         |                  |
|                     | Cultural Facilities       | Cinema/Theater                             |                  |                 |        |         |                  |
|                     |                           | Cultural Center                            |                  |                 |        |         |                  |
|                     |                           | Bookstore                                  |                  |                 |        |         |                  |
|                     | Other                     | Agricultural Service Station               |                  |                 |        |         |                  |
